# Supplementary material for: Regional outbreak of community-associated methicillin-resistant Staphylococcus aureus ST834 in Japanese children
Source: BMC Infect Dis. 2019 Jan 9;19:35. doi: 10.1186/s12879-018-3646-z (PMC6327381; doi:10.1186/s12879-018-3646-z)
Supplement: Supplementary file 2 — Table S2. Detailed results of whole genome sequencing a SNPs, single nucleotide polymorphisms. (XLSX 12 kb) [file 12879_2018_3646_MOESM2_ESM.xlsx]

## Sheet: Table 2
Table 2 Detailed results of whole genome sequencing
Strain	Number of reads	Matched reads	Total matched bases	Coverage (%)	N50	Number of assembled contigs	Total size (bp)	GC content (%)	No. of SNPsa
Saitama1	2710870	2552091	406475972	148.851	170339	40	2730750	32.7	51
Saitama2	3015342	2827096	424001960	153.235	177472	40	2767007	32.6	0 (reference)
Saitama4	3751216	2806937	407071760	147.918	124787	49	2752014	32.6	118
Saitama5	4435018	3740178	539651746	195.201	153855	43	2764594	32.6	77
Saitama8	2028142	1701993	286254154	103.724	149662	37	2759759	32.4	108
Saitama9	2618118	2270594	313816164	114.169	103290	54	2748702	32.7	76
Saitama10	2341856	1965623	323468523	116.967	142634	41	2765467	32.5	35
Saitama11	2351038	1979516	317486505	111.645	95537	55	2843720	32.6	119
Saitama13	3090406	2569142	399664835	144.66	147980	44	2762789	32.4	120
Saitama14	1140420	1105054	235907203	85.2294	73910	71	2767910	32.6	67
